# Supplementary material for: Efficient catalysis of H2O2with ionic liquid molecules to generate hydroxyl radicals and application in green chemistry cotton processes
Source: Royal Society of Chemistry journal article supplement (doi:10.1039/d3gc00963g), 2023-01-01
Supplement: d3gc00963g1.pdf [file d3gc00963g1.pdf]

## Efficient catalysis of H<sub>2</sub>O<sub>2</sub> to generate the hydroxyl radicals with ionic liquid molecules and application in cotton green chemistry process

Kongliang Xie,<sup>a</sup> Xiang Zhuang,<sup>a</sup> Xiang Luo,<sup>a</sup> Zeye Jing,<sup>a</sup> Xiyu Song,<sup>\*a,b</sup> Aiqin Hou,<sup>a</sup> and Aiqin Gao<sup>\*a</sup>

### Supporting Data

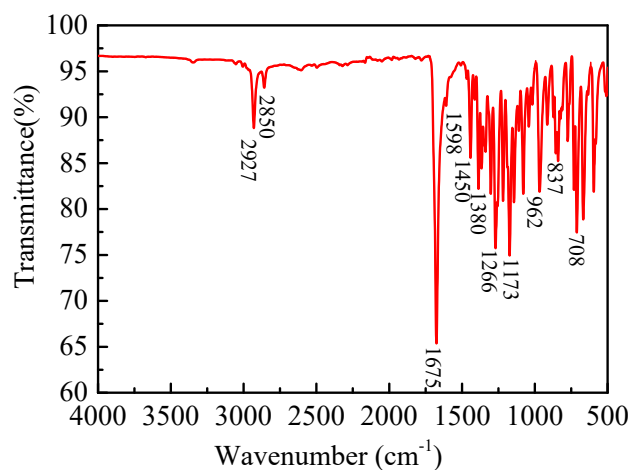

Fig. S1 FTIR of intermediate N-[(4-chloromethyl)-benzoyl] caprolactam

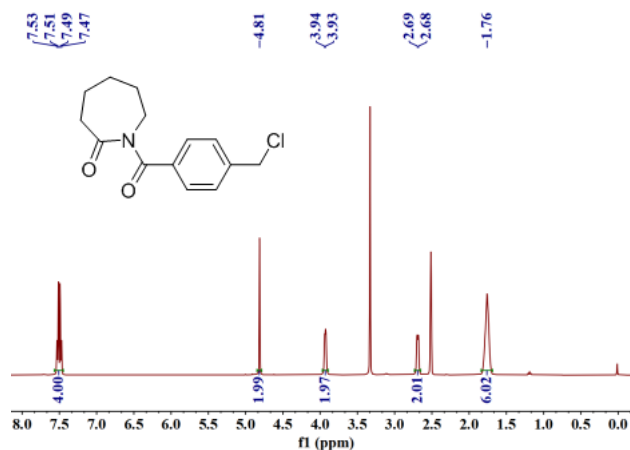

Fig. S2 <sup>1</sup>H NMR of intermediate N-[(4-chloromethyl)-benzoyl] caprolactam

Fig. S3 <sup>13</sup>C NMR of intermediate N-[(4-chloromethyl)-benzoyl] caprolactam

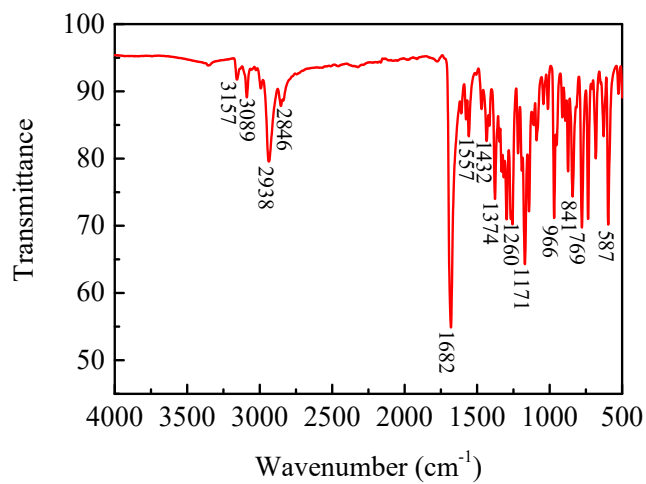

Fig. S4 FTIR of C-1

Fig. S5 <sup>1</sup>H NMR of C-1

Fig. S6 <sup>13</sup>C NMR of C-1

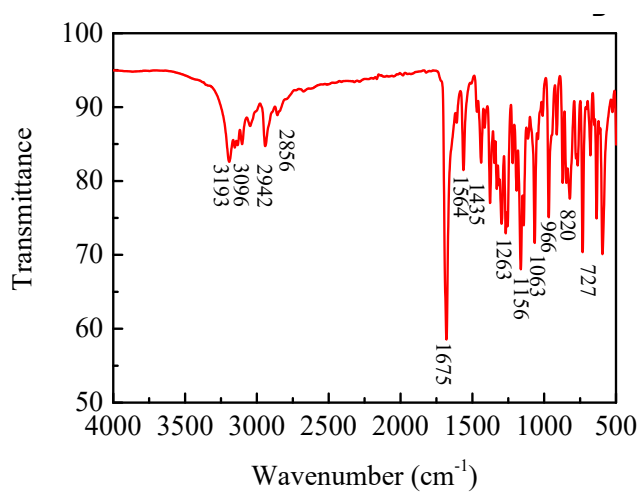

Fig. S7 FTIR of C-2

Fig. S8 <sup>1</sup>H NMR of C-2

Fig. S9 <sup>13</sup>C NMR of C-2

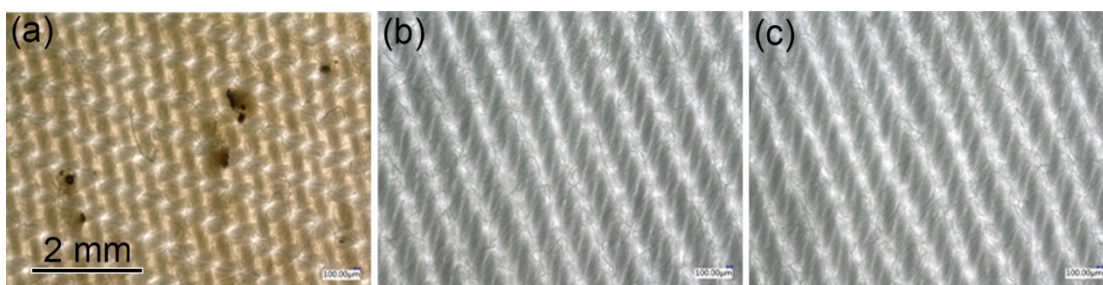

Fig. S10. Microscope images of the cotton fabrics. (a) Cotton fabrics with amorphous cottonseed shell residues pretreated with water without IL molecules; (b) Cotton fabrics pretreated with IL C-1; (c) Cotton fabrics pretreated with IL C-2.

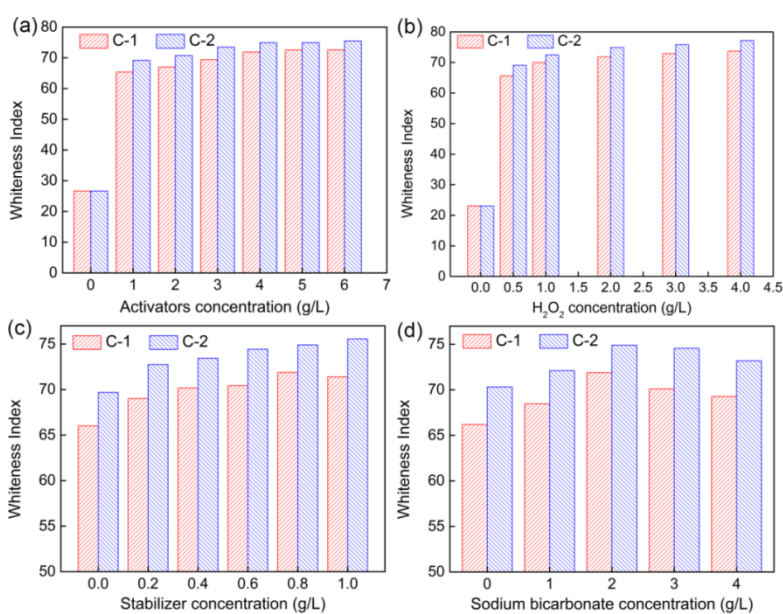

Fig. S11. Effect of (a) activators concentration, (b) H<sub>2</sub>O<sub>2</sub> concentration, (c) stabilizer concentration and (d) sodium bicarbonate concentration on the whiteness index of the bleached fabric.

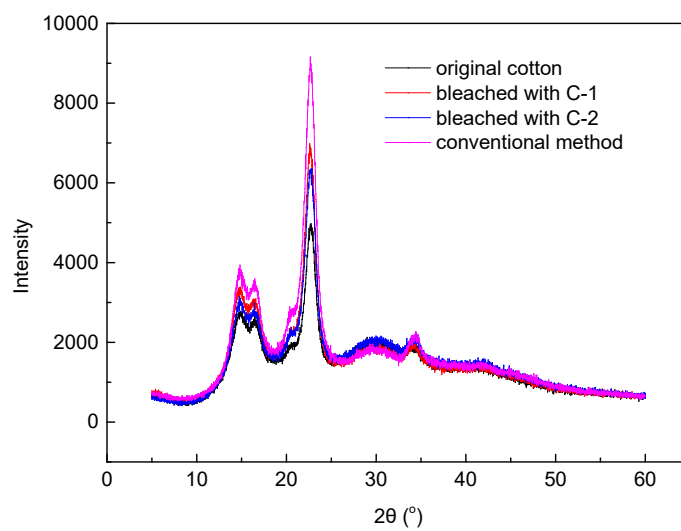

Fig. S12 XRD of the cotton fibre
